# Supplementary material for: Distal regulatory elements identified by methylation and hydroxymethylation haplotype blocks from mouse brain
Source: PubMed Central journal article supplement (PMC6311040; doi:10.1186/s13072-018-0248-3), 2018-12-29
Supplement: 13072_2018_248_MOESM2_ESM.pdf [file 13072_2018_248_MOESM2_ESM.pdf]

**Table S1 Summary of single-base 5mC and 5hmC sequencing using oxBS-seq and TAB-seq.**

|                |                                   | Cortex | Olfactory bulb | Cerebellum |
|----------------|-----------------------------------|--------|----------------|------------|
| 5hmC (TAB-Seq) | Bisulfite conversion rate         | 99.20% | 99.53%         | 99.11%     |
|                | Tet oxidation rate                | 98.38% | 98.45%         | 98.11%     |
|                | Protection rate                   | 98.93% | 99.31%         | 99.14%     |
|                | Mapped depth                      | 23     | 26             | 21         |
|                | #CpG covered > 5X                 | 20.02M | 20.23M         | 19.55M     |
|                | Average 5hmC level in CpG context | 16.48% | 14.60%         | 10.00%     |
| 5mC (oxBS-Seq) | Bisulfite conversion rate         | 99.85% | 99.86%         | 99.85%     |
|                | Oxidization rate                  | 99.00% | 98.61%         | 98.95%     |
|                | Mapped depth                      | 17     | 30             | 20         |
|                | #CpG covered > 5X                 | 19.19M | 20.16M         | 19.42M     |
|                | Average 5mC level in CpG context  | 64.93% | 67.00%         | 68.78%     |

Both bisulfite conversion rate and oxidation rate by Tet was calculated by *M. SsI* treated spiked lambda DNA. Average 5hmC and 5mC level for all CpG sites is calculated as C/(C+T) for TAB-seq and oxBS-seq, respectively. M means million.

**Table S2 Summary of RNA-seq.**

|                            | Total reads | Uniquely mapped reads | Uniquely mapped rate |
|----------------------------|-------------|-----------------------|----------------------|
| Cortex replicate 1         | 12.15G      | 9.27G                 | 76.30%               |
| Cortex replicate 2         | 17.01 G     | 14.68G                | 86.30%               |
| Olfactory bulb replicate 1 | 11.32G      | 9.11G                 | 80.40%               |
| Olfactory bulb replicate 2 | 12.53G      | 10.39G                | 82.90%               |
| Cerebellum replicate 1     | 14.10G      | 12.25G                | 86.90%               |
| Cerebellum replicate 2     | 8.60G       | 6.751                 | 78.50%               |

The raw FASTQ data files were mapped to the mouse reference sequence (mm10) for mRNA analysis and gencode version 9 for ncRNA analysis using Tophat program. G means billion.
